# Supplementary material
Source: Royal Society of Chemistry journal article supplement (doi:10.1039/d6sm00050a)
Supplement: d6sm00050a1.pdf [file d6sm00050a1.pdf]

## Rational design of amphiphilic pyrrolidinium derivatives: structure–activity relationships and alkyl chain tuning for superior antimicrobial activity

Elmira A. Vasilieva<sup>1</sup>, Kuznetsova D.A.\*<sup>1</sup>, Roman A. Babkin<sup>1,2</sup>, Denis M. Kuznetsov<sup>1</sup>, Anna P. Lubina<sup>1</sup>, Alexandra D. Voloshina<sup>1</sup>, Dilyara G. Valeeva<sup>2</sup>, Lucia Ya. Zakharova<sup>1,2</sup>

<sup>1</sup>Arbuzov Institute of Organic and Physical Chemistry, FRC Kazan Scientific Center of RAS, Arbuzov str. 8, 420088, Kazan, Russia

<sup>2</sup>Kazan National Research Technological University, Karl Marx Str. 68, 420015, Russia

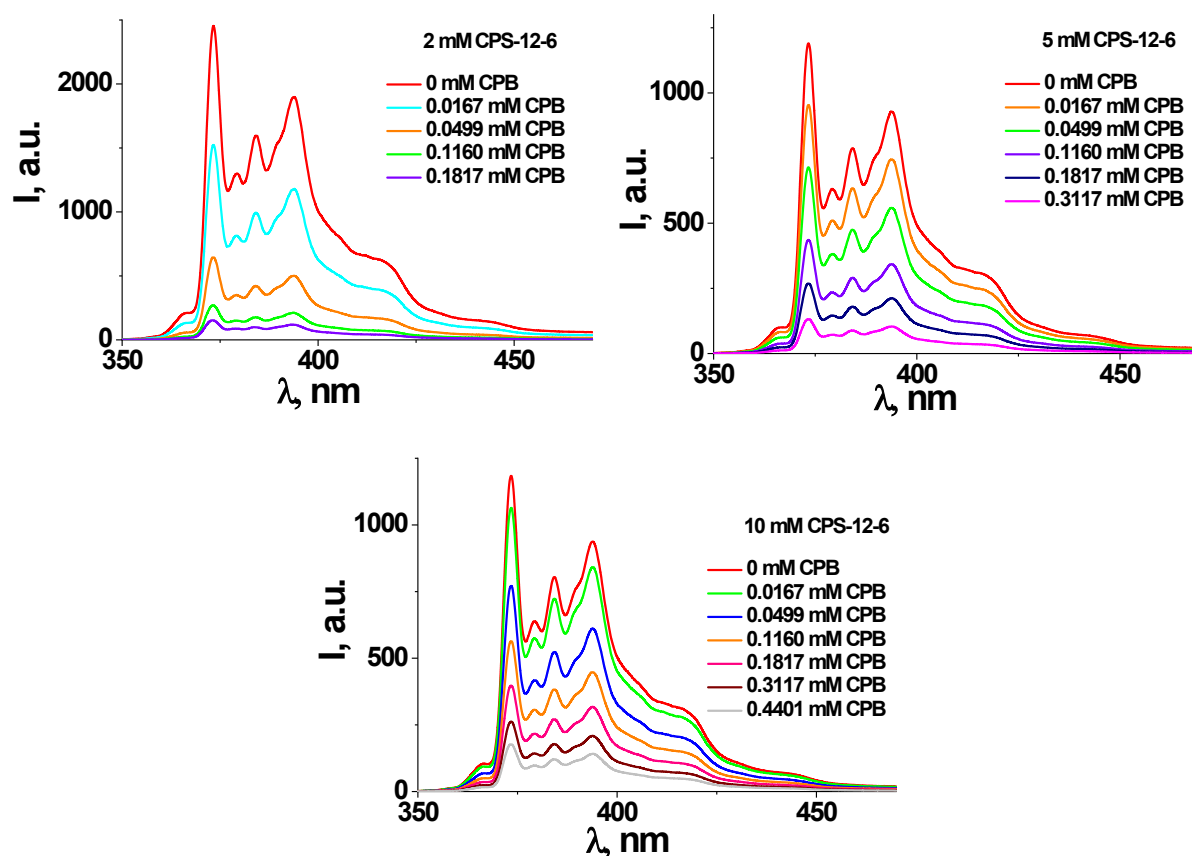

**Fig. S1.** Fluorescence quenching spectra of pyrene depending on the CPB concentration for CPS-12-6, 25 °C.

\* Corresponding author at: Arbuzov Institute of Organic and Physical Chemistry, FRC Kazan Scientific Center of RAS, Arbuzov str. 8, 420088, Kazan, Russia.

E-mail: dashyna111@mail.ru (Darya A. Kuznetsova)

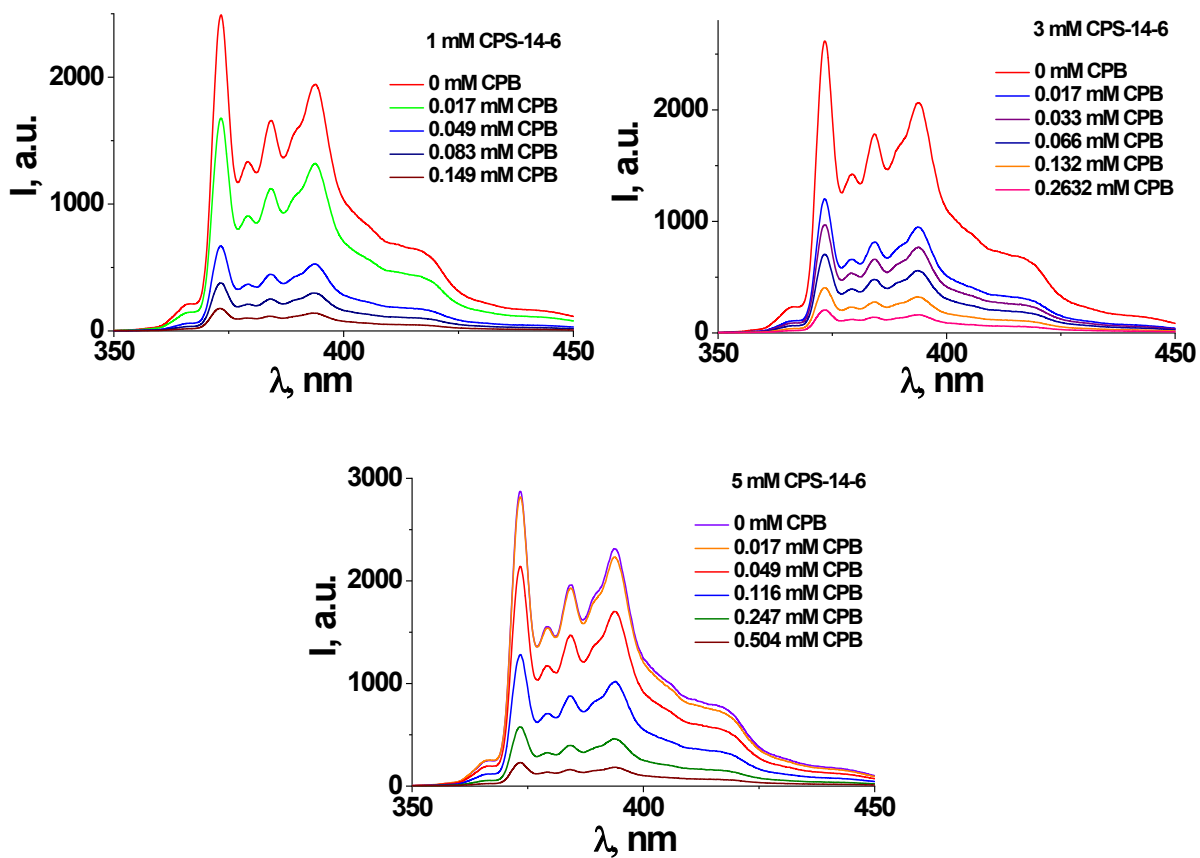

Fig. S2. Fluorescence quenching spectra of pyrene depending on the CPB concentration for CPS-14-6, 25 °C.

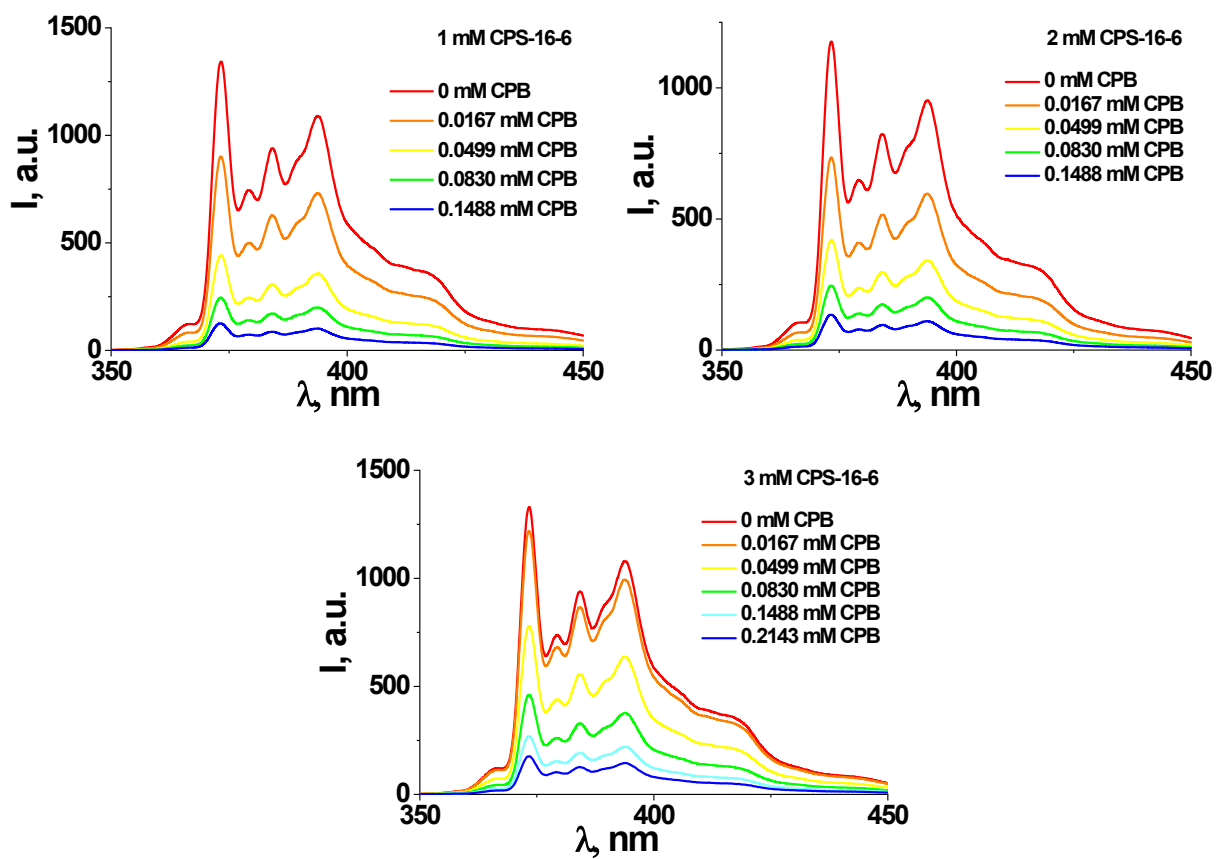

**Fig. S.3.** Fluorescence quenching spectra of pyrene depending on the CPB concentration for CPS-16-6, 25 °C.

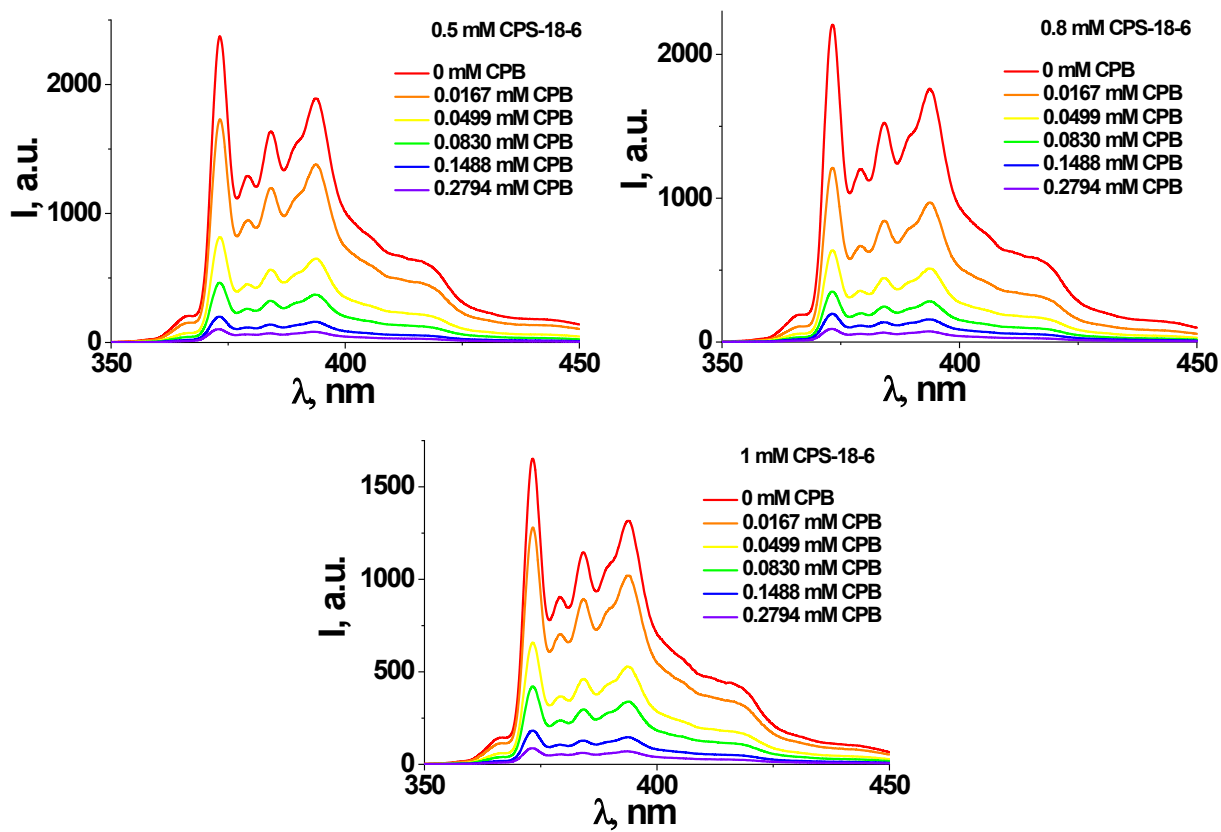

**Fig. S.4.** Fluorescence quenching spectra of pyrene depending on the CPB concentration for CPS-18-6, 25 °C.

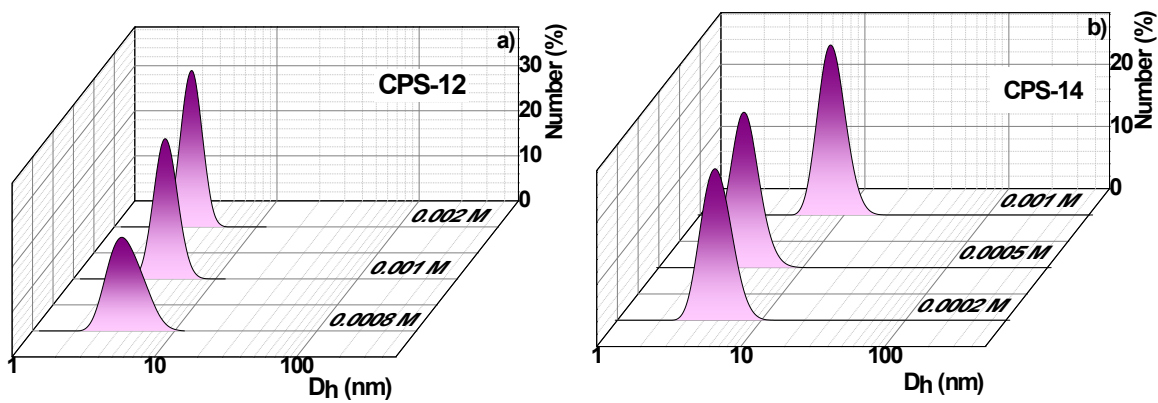

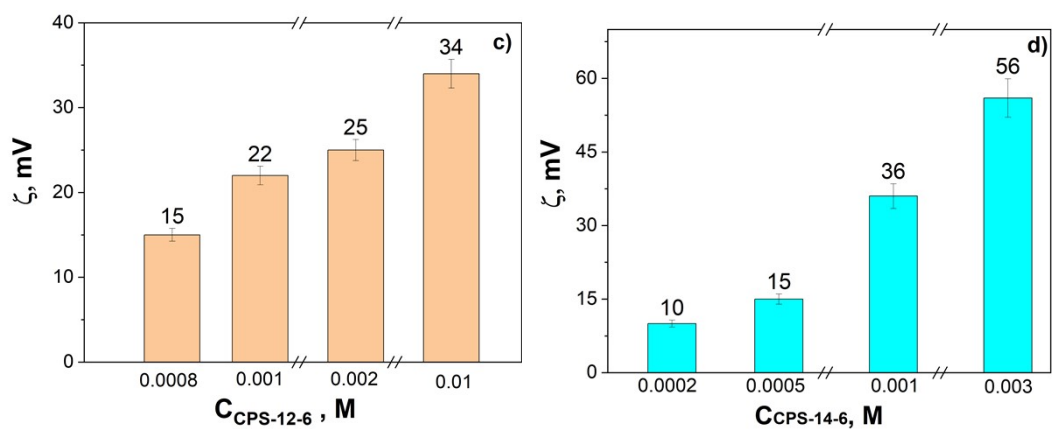

**Fig. S5.** Number-averaged size distribution and  $\zeta$ -potential of CPS-12-6 (a, c) and CPS-14-6 (b, d) aggregates at 25 °C.

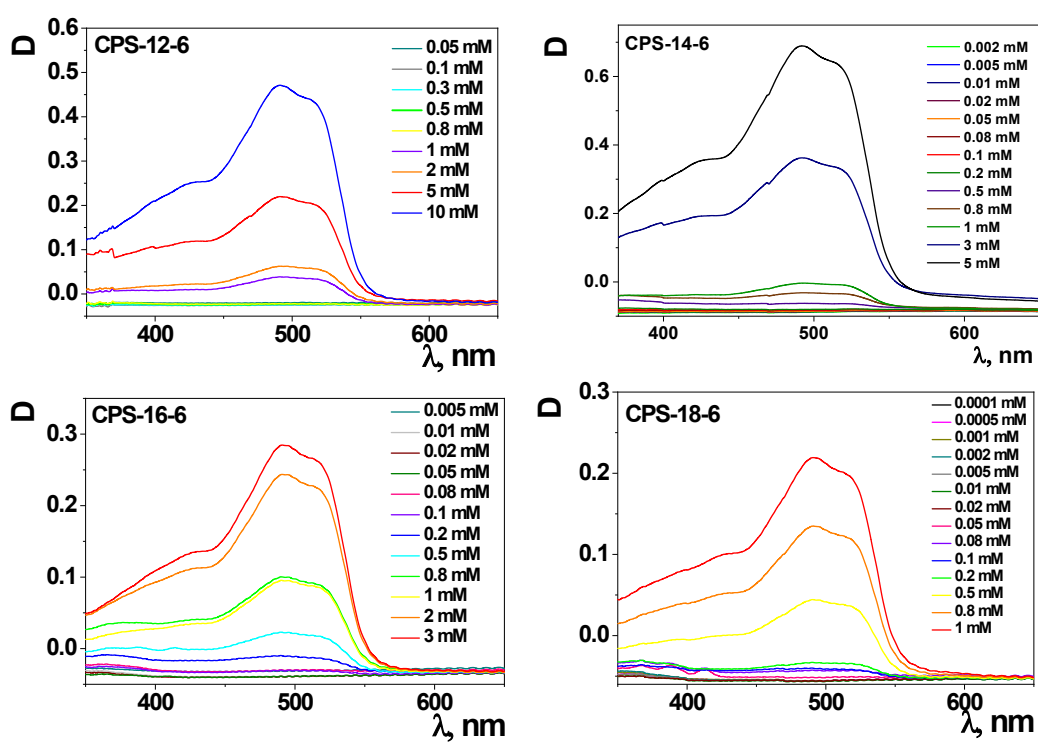

**Fig. S6.** Electronic absorption spectra of Orange OT for CPS-n-6/Orange OT binary systems;  $l=1$  cm, 25 °C.

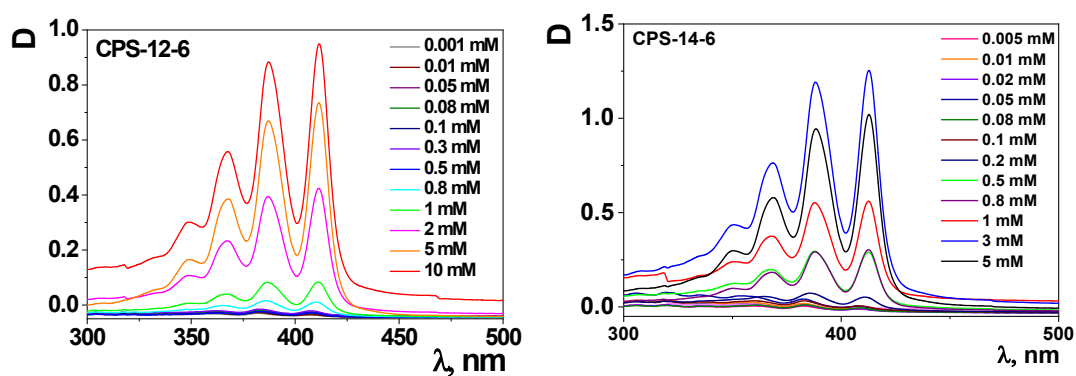

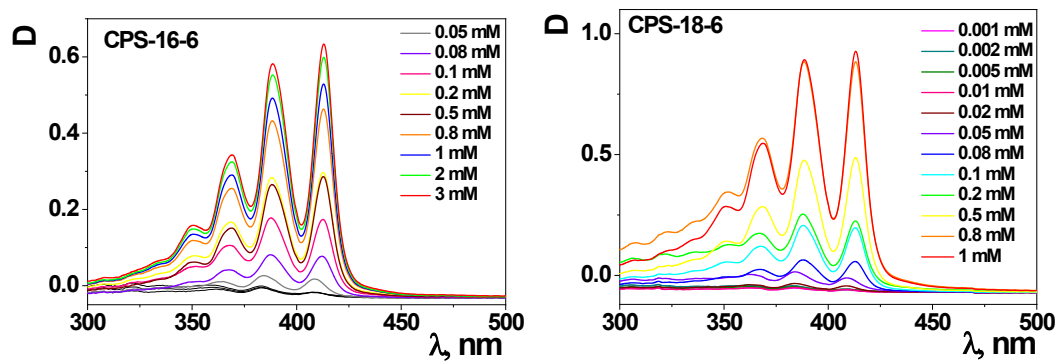

**Fig. S7.** Electronic absorption spectra of amphotericin B for CPS-n-6/amphotericin B binary systems;  $l=1$  cm, 25 °C.

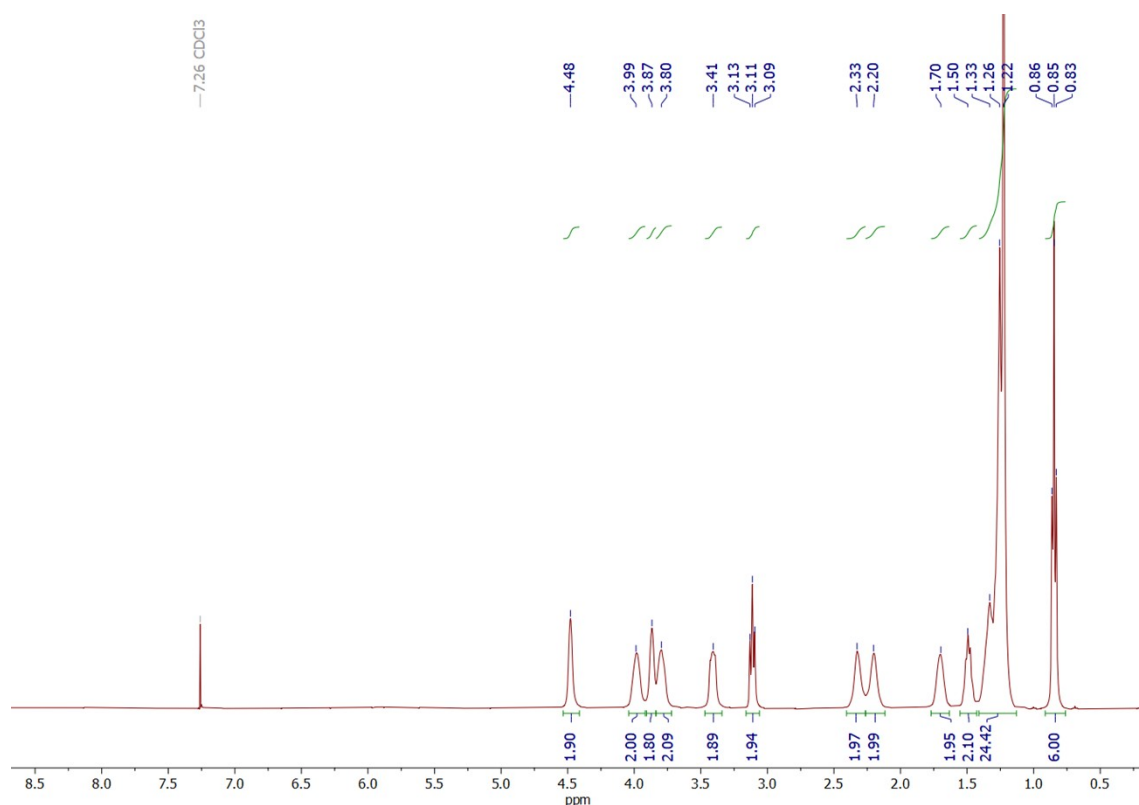

**Fig. S8.** NMR  $^1\text{H}$  spectrum of CPS-12-6

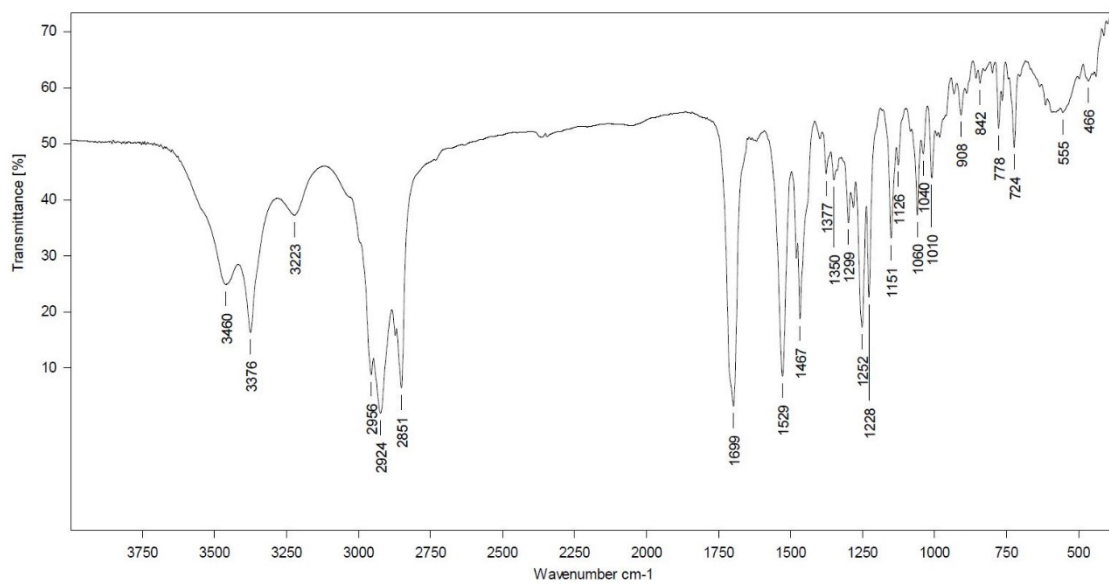

**Fig. S9.** IR spectrum of CPS-12-6.

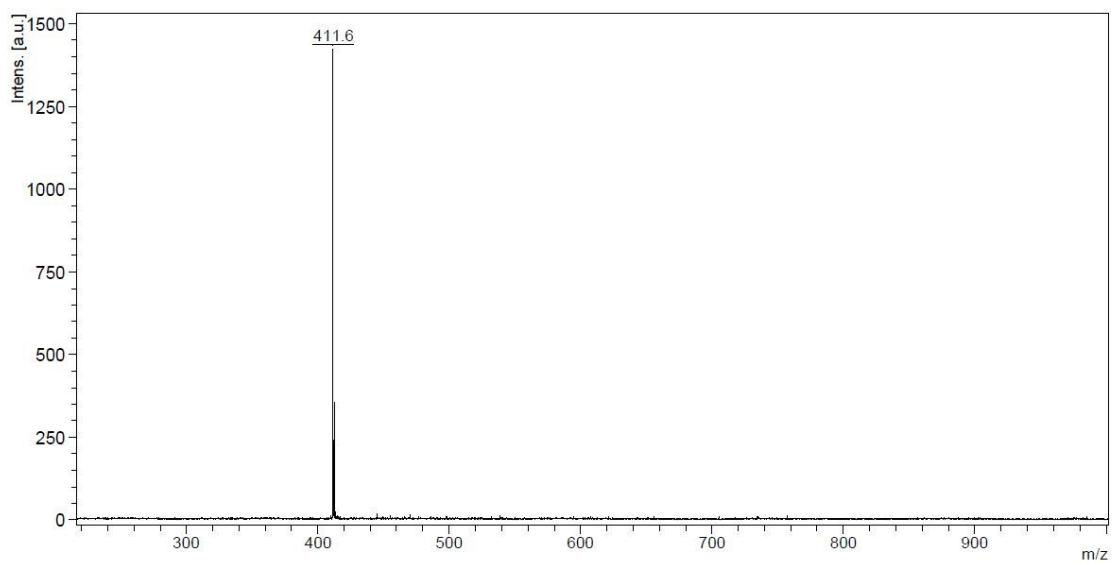

**Fig. 10.** MALDI mass spectrum of CPS-12-6.

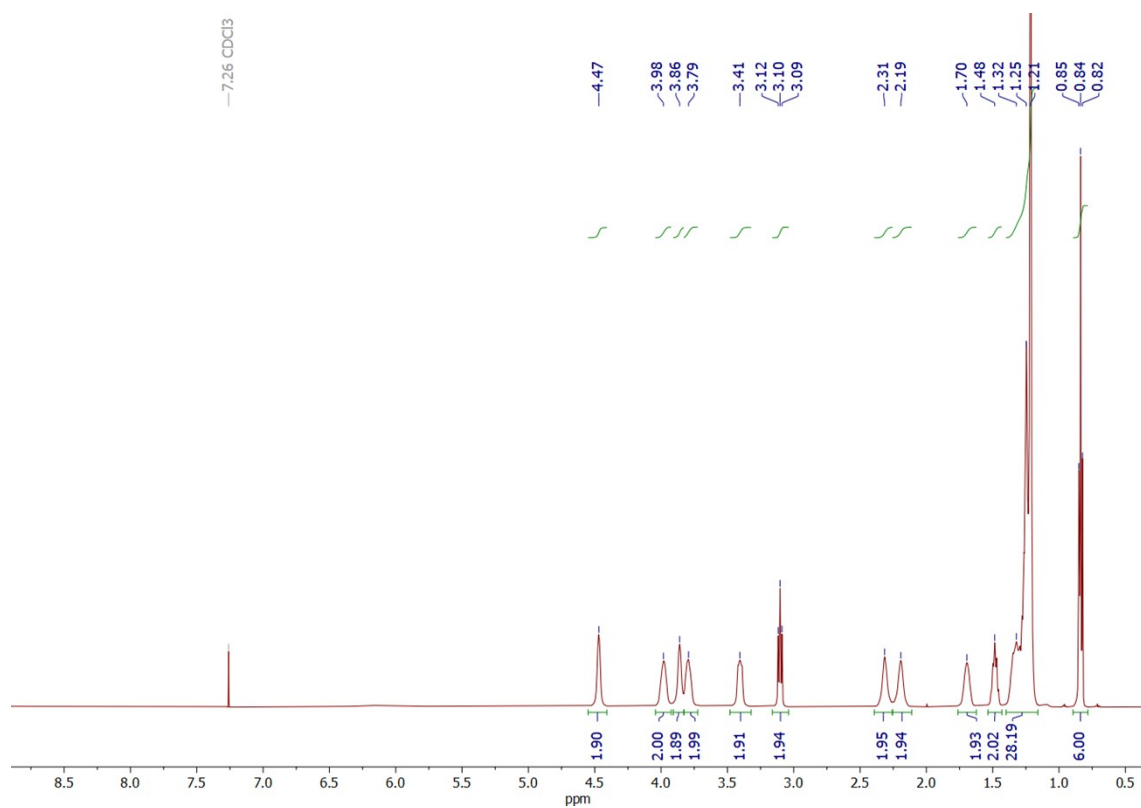

**Fig. S11.** NMR <sup>1</sup>H spectrum of CPS-14-6

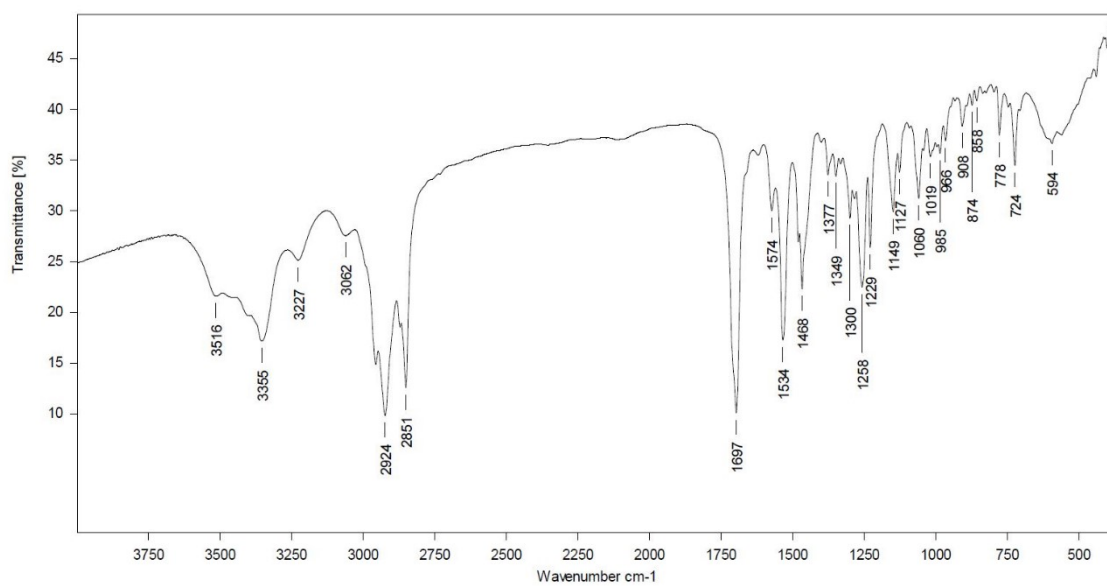

**Fig. S12.** IR spectrum of CPS-14-6.

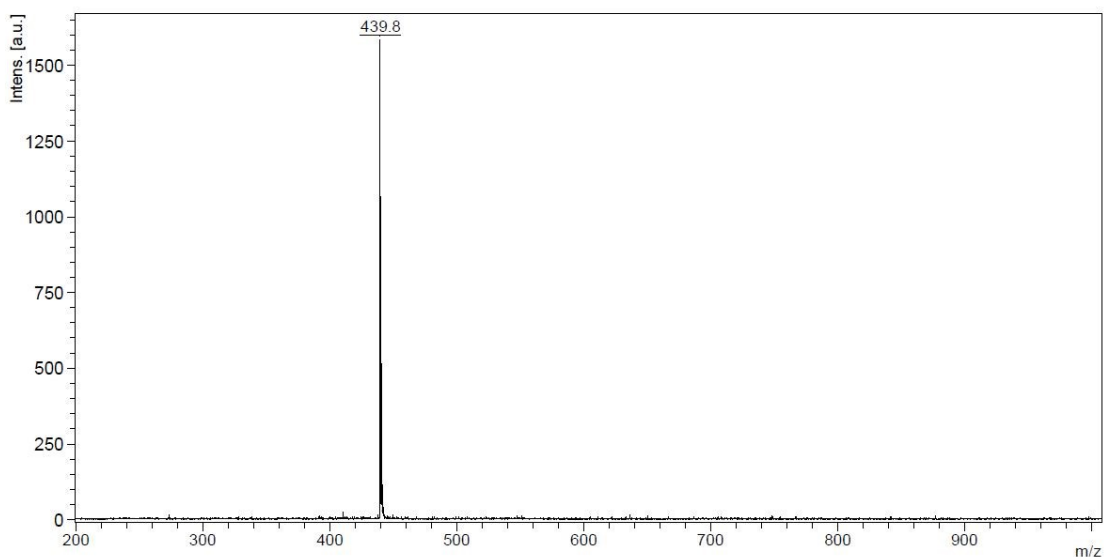

**Fig. 13.** MALDI mass spectrum of CPS-14-6.

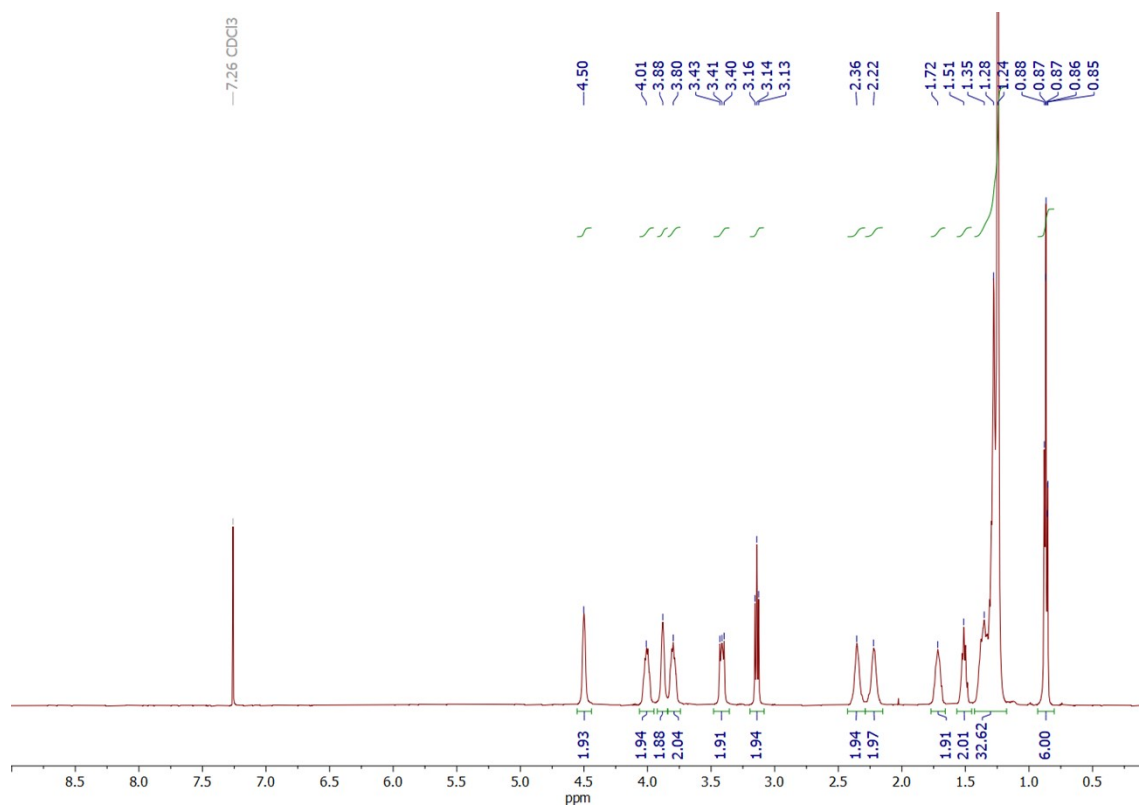

**Fig. S14.** NMR <sup>1</sup>H spectrum of CPS-16-6

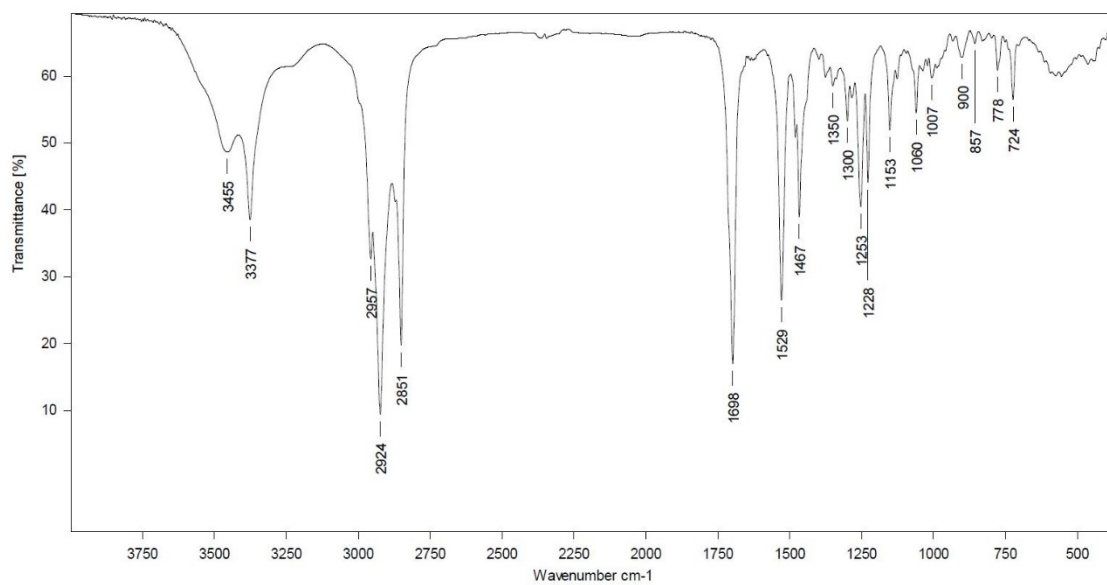

**Fig. S15.** IR spectrum of CPS-16-6.

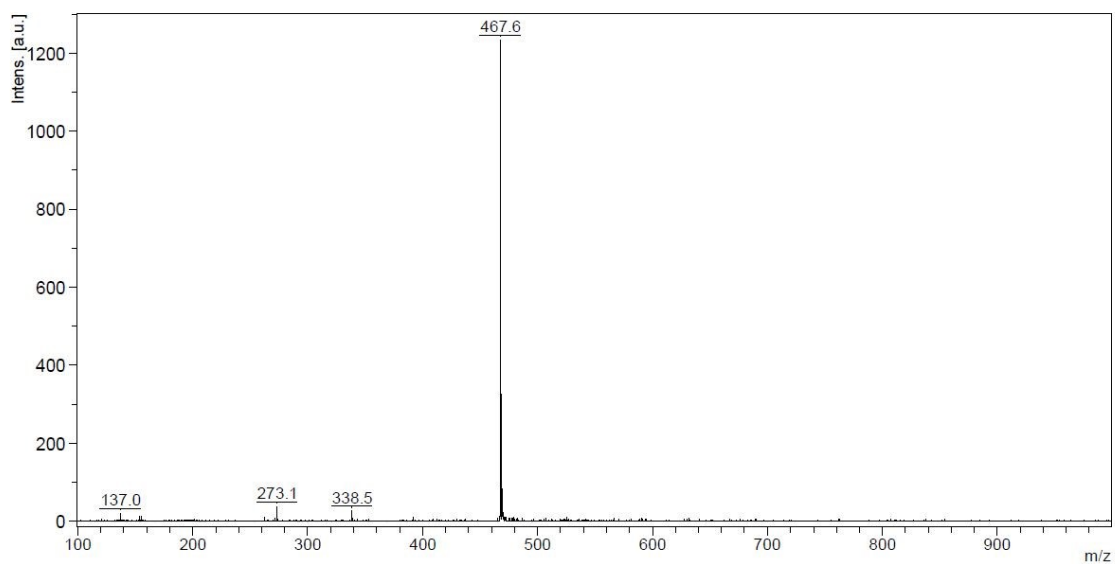

**Fig. 16.** MALDI mass spectrum of CPS-16-6.

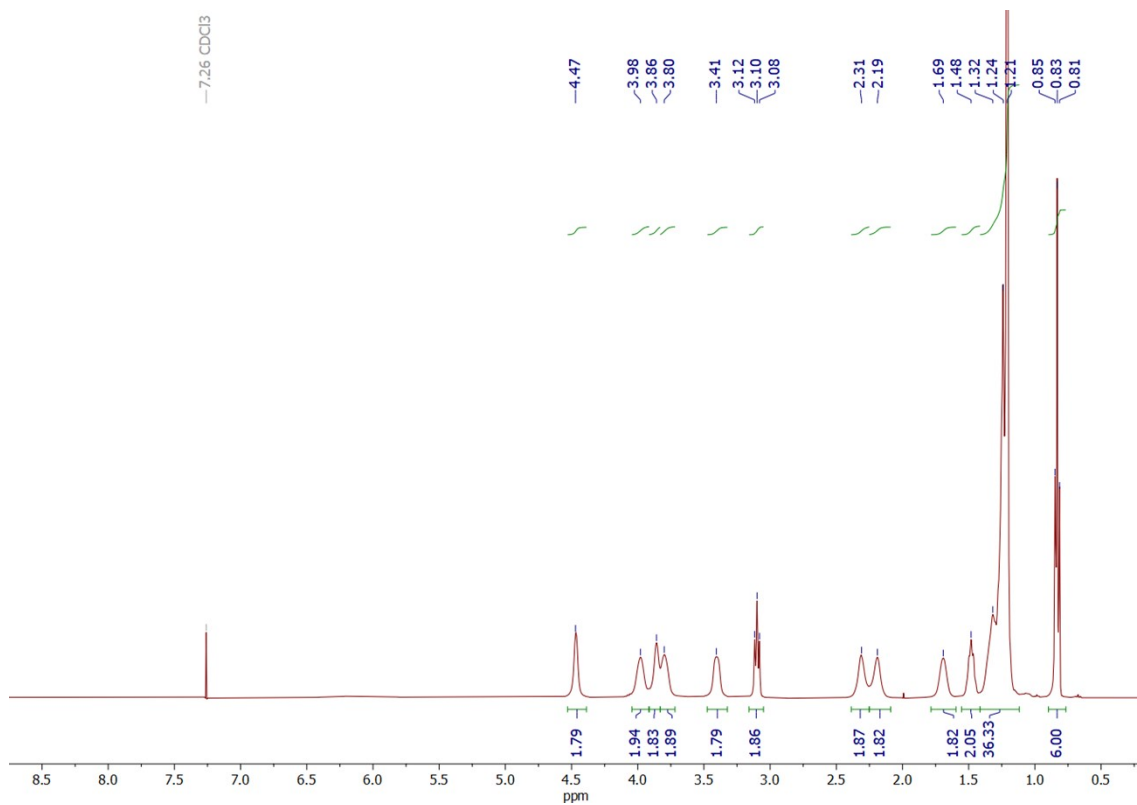

**Fig. S17.** NMR <sup>1</sup>H spectrum of CPS-18-6

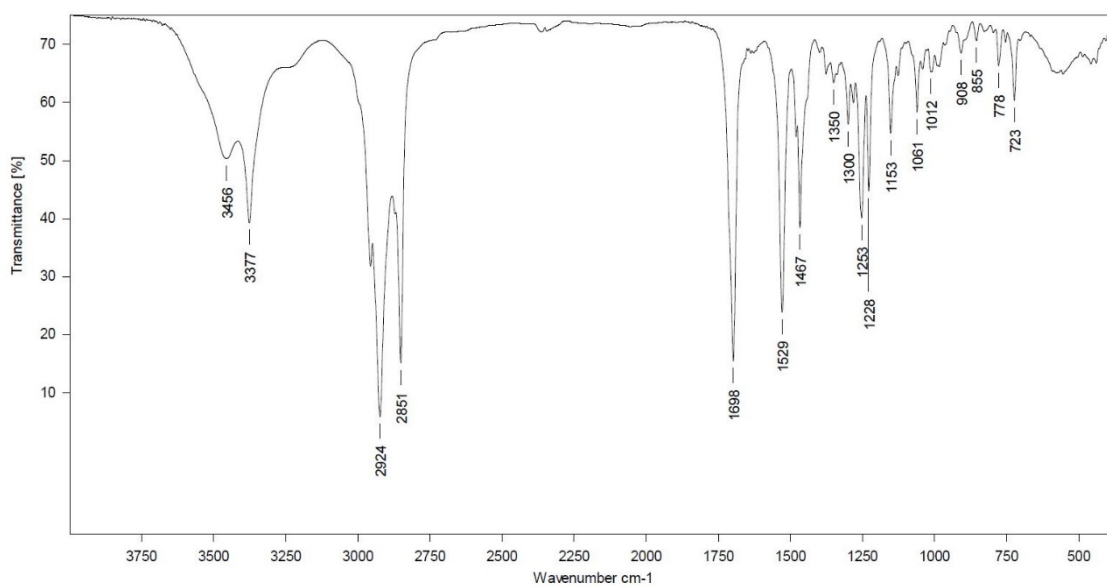

**Fig. S18.** IR spectrum of CPS-18-6.

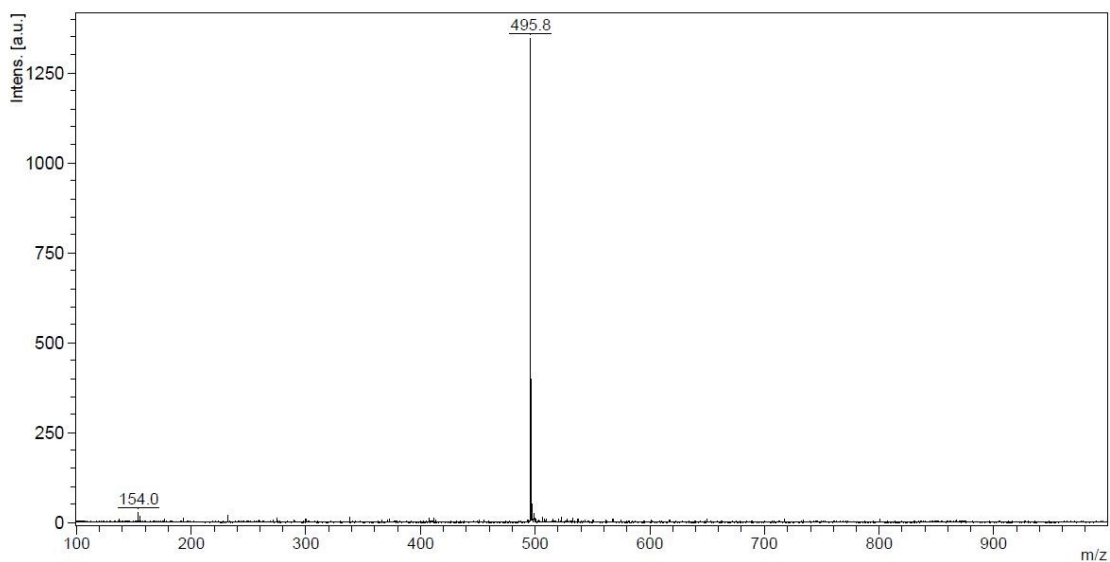

**Fig. S19.** MALDI mass spectrum of CPS-18-6.

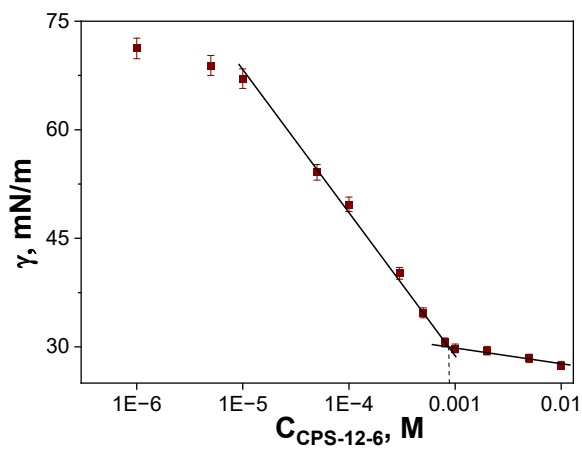

**Fig. S20.** Determination of CMC using the straight-line method, with the example of CPS-12-6.
